# Supplementary material for: Ankyrin Repeat Domain 1 Protein: A Functionally Pleiotropic Protein with Cardiac Biomarker Potential
Source: MDPI journal article supplement (doi:10.3390/ijms18071362), 2017-06-26
Supplement: s1 [file s1]

**Table S1.** MicroRNAs predicted to target ANKRD1.

| TargetScan     |                  | miRDB                  | miRanda                            |                                           |
|----------------|------------------|------------------------|------------------------------------|-------------------------------------------|
| Conserved      | Poorly Conserved | Gene<br>(Target score) | Good mirSVR score and<br>conserved | Non-good mirSVR<br>score<br>and conserved |
| hsa-miR-582-5p | hsa-miR-3920     | hsa-miR-4729           | hsa-miR-544                        | hsa-miR-544                               |
|                | hsa-miR-4699-3p  | hsa-miR-4698           | hsa-miR-34a                        | hsa-miR-539                               |
|                | hsa-miR-4698     | hsa-miR-4768-3p        | hsa-miR-10b                        | hsa-miR-191                               |
|                | hsa-miR-8063     | hsa-miR-4446-3p        | hsa-miR-10a                        | hsa-miR-34a                               |
|                | hsa-miR-5581-5p  | hsa-miR-760            | hsa-miR-425                        | hsa-miR-203                               |
|                | hsa-miR-4297     | hsa-miR-4427           | hsa-miR-218                        | hsa-miR-10b                               |
|                | hsa-miR-532-5p   | hsa-miR-3160-5p        | hsa-miR-300                        | hsa-miR-10a                               |
|                | hsa-miR-6872-3p  | hsa-miR-6515-3p        | hsa-miR-381                        | hsa-miR-425                               |
|                | hsa-miR-6508-3p  | hsa-miR-3163           | hsa-miR-33a                        | hsa-miR-218                               |
|                | hsa-miR-4726-5p  | hsa-miR-338-5p         | hsa-miR-33b                        | hsa-miR-139-5p                            |
|                | hsa-miR-4640-5p  | hsa-miR-425-5p         | hsa-miR-410                        | hsa-miR-326                               |
|                | hsa-miR-6724-5p  | hsa-miR-5003-5p        | hsa-miR-340                        | hsa-miR-300                               |
|                | hsa-miR-6773-5p  | hsa-miR-8088           | hsa-miR-873                        | hsa-miR-381                               |
|                | hsa-miR-6774-5p  | hsa-miR-6837-3p        | hsa-miR-449a                       | hsa-miR-33a                               |
|                | hsa-miR-635      | hsa-miR-4509           | hsa-miR-449b                       | hsa-miR-33b                               |
|                | hsa-miR-4753-3p  | hsa-miR-544a           | hsa-miR-34c-5p                     | hsa-miR-410                               |
|                | hsa-miR-6809-3p  | hsa-miR-8055           |                                    | hsa-miR-219-5p                            |
|                | hsa-miR-942-5p   | hsa-miR-493-5p         |                                    | hsa-miR-340                               |
|                | hsa-miR-6515-3p  | hsa-miR-3074-3p        |                                    | hsa-miR-873                               |
|                | hsa-miR-1236-3p  | hsa-miR-20a-3p         |                                    | hsa-miR-181c                              |
|                | hsa-miR-6818-3p  | hsa-miR-6835-5p        |                                    | hsa-miR-181a                              |
|                | hsa-miR-6895-3p  | hsa-miR-506-5p         |                                    | hsa-miR-181d                              |
|                | hsa-miR-593-3p   | hsa-miR-146a-3p        |                                    | hsa-miR-101                               |
|                | hsa-miR-6069     | hsa-miR-3920           |                                    | hsa-miR-144                               |
|                | hsa-miR-135b-5p  | hsa-miR-6849-3p        |                                    | hsa-miR-449a                              |
|                | hsa-miR-135a-5p  | hsa-miR-642b-3p        |                                    | hsa-miR-449b                              |
|                | hsa-miR-889-5p   | hsa-miR-642a-3p        |                                    | hsa-miR-34c-5p                            |
|                | hsa-miR-8074     | hsa-miR-4666a-3p       |                                    | hsa-miR-217                               |
|                | hsa-miR-28-3p    |                        |                                    | hsa-miR-376c                              |
|                | hsa-miR-708-3p   |                        |                                    | hsa-miR-27a                               |
|                | hsa-miR-7844-5p  |                        |                                    | hsa-miR-27b                               |
|                | hsa-miR-3121-3p  |                        |                                    | hsa-miR-135a                              |
|                | hsa-miR-3161     |                        |                                    | hsa-miR-135b                              |
|                | hsa-miR-599      |                        |                                    | hsa-miR-371-5p                            |
|                | hsa-miR-138-1-3p |                        |                                    | hsa-miR-129-5p                            |
|                | hsa-miR-138-1-3p |                        |                                    | hsa-miR-106a                              |
|                | hsa-miR-5003-5p  |                        |                                    | hsa-miR-106b                              |
|                | hsa-miR-513b-5p  |                        |                                    | hsa-miR-17                                |
|                | hsa-miR-6837-3p  |                        |                                    | hsa-miR-20a                               |
|                | hsa-miR-412-3p   |                        |                                    | hsa-miR-20b                               |
|                | hsa-miR-6754-3p  |                        |                                    | hsa-miR-93                                |

| TargetScan |                  | miRDB                  | miRanda                            |                                           |
|------------|------------------|------------------------|------------------------------------|-------------------------------------------|
| Conserved  | Poorly Conserved | Gene<br>(Target score) | Good mirSVR score and<br>conserved | Non-good mirSVR<br>score<br>and conserved |
|            | hsa-miR-6509-5p  |                        |                                    | hsa-miR-519d                              |
|            | hsa-miR-331-5p   |                        |                                    | hsa-miR-339-5p                            |
|            | hsa-miR-5582-3p  |                        |                                    | hsa-miR-204                               |
|            | hsa-miR-5480-3p  |                        |                                    | hsa-miR-211                               |
|            | hsa-miR-1323     |                        |                                    | hsa-miR-199b-5p                           |
|            | hsa-miR-616-5p   |                        |                                    | hsa-miR-199a-5p                           |
|            | hsa-miR-371b-5p  |                        |                                    | hsa-miR-433                               |
|            | hsa-miR-373-5p   |                        |                                    | hsa-miR-149                               |
|            | hsa-miR-371a-5p  |                        |                                    | hsa-miR-205                               |
|            | hsa-miR-372-5p   |                        |                                    | hsa-miR-197                               |
|            | hsa-miR-514b-5p  |                        |                                    | hsa-miR-488                               |
|            | hsa-miR-513c-5p  |                        |                                    | hsa-miR-361-5p                            |
|            | hsa-miR-3160-5p  |                        |                                    | hsa-miR-543 12                            |
|            | hsa-miR-218-5p   |                        |                                    | hsa-miR-365 22                            |
|            | hsa-miR-636      |                        |                                    |                                           |
|            | hsa-miR-6737-3p  |                        |                                    |                                           |
|            | hsa-miR-7157-3p  |                        |                                    |                                           |
|            | hsa-miR-5008-3p  |                        |                                    |                                           |
|            | hsa-miR-1914-5p  |                        |                                    |                                           |
|            | hsa-miR-10a-5p   |                        |                                    |                                           |
|            | hsa-miR-10b-5p   |                        |                                    |                                           |
|            | hsa-miR-6732-3p  |                        |                                    |                                           |
|            | hsa-miR-652-5p   |                        |                                    |                                           |
|            | hsa-miR-651-3p   |                        |                                    |                                           |
|            | hsa-miR-4509     |                        |                                    |                                           |
|            | hsa-miR-5692a    |                        |                                    |                                           |
|            | hsa-miR-548c-3p  |                        |                                    |                                           |
|            | hsa-miR-5692a    |                        |                                    |                                           |
|            | hsa-miR-5692a    |                        |                                    |                                           |
|            | hsa-miR-545-5p   |                        |                                    |                                           |
|            | hsa-miR-548au-3p |                        |                                    |                                           |
|            | hsa-miR-34c-5p   |                        |                                    |                                           |
|            | hsa-miR-449b-5p  |                        |                                    |                                           |
|            | hsa-miR-449a     |                        |                                    |                                           |
|            | hsa-miR-34a-5p   |                        |                                    |                                           |
|            | hsa-miR-222-5p   |                        |                                    |                                           |
|            | hsa-miR-936      |                        |                                    |                                           |
|            | hsa-miR-199b-3p  |                        |                                    |                                           |
|            | hsa-miR-199a-3p  |                        |                                    |                                           |
|            | hsa-miR-3129-5p  |                        |                                    |                                           |
|            | hsa-miR-5094     |                        |                                    |                                           |
|            | hsa-miR-3074-3p  |                        |                                    |                                           |
|            | hsa-miR-4427     |                        |                                    |                                           |

| TargetScan |                  | miRDB                  | miRanda                            |                                           |
|------------|------------------|------------------------|------------------------------------|-------------------------------------------|
| Conserved  | Poorly Conserved | Gene<br>(Target score) | Good mirSVR score and<br>conserved | Non-good mirSVR<br>score<br>and conserved |
|            | hsa-miR-4680-3p  |                        |                                    |                                           |
|            | hsa-miR-5187-3p  |                        |                                    |                                           |
|            | hsa-miR-493-3p   |                        |                                    |                                           |
|            | hsa-miR-8060     |                        |                                    |                                           |
|            | hsa-miR-7154-5p  |                        |                                    |                                           |
|            | hsa-miR-1255a    |                        |                                    |                                           |
|            | hsa-miR-1255b-5p |                        |                                    |                                           |
|            | hsa-miR-6744-5p  |                        |                                    |                                           |
|            | hsa-miR-3134     |                        |                                    |                                           |
|            | hsa-miR-4733-3p  |                        |                                    |                                           |
|            | hsa-miR-1226-3p  |                        |                                    |                                           |
|            | hsa-miR-6511b-3p |                        |                                    |                                           |
|            | hsa-miR-6511a-3p |                        |                                    |                                           |
|            | hsa-miR-1178-3p  |                        |                                    |                                           |
|            | hsa-miR-767-3p   |                        |                                    |                                           |
|            | hsa-miR-6828-3p  |                        |                                    |                                           |
|            | hsa-miR-6728-3p  |                        |                                    |                                           |
|            | hsa-miR-3194-3p  |                        |                                    |                                           |
|            | hsa-miR-6796-3p  |                        |                                    |                                           |
|            | hsa-miR-3928-5p  |                        |                                    |                                           |
|            | hsa-miR-6806-3p  |                        |                                    |                                           |
|            | hsa-miR-127-5p   |                        |                                    |                                           |
|            | hsa-miR-3646     |                        |                                    |                                           |
|            | hsa-miR-381-3p   |                        |                                    |                                           |
|            | hsa-let-7b-3p    |                        |                                    |                                           |
|            | hsa-miR-300      |                        |                                    |                                           |
|            | hsa-let-7a-3p    |                        |                                    |                                           |
|            | hsa-let-7f-1-3p  |                        |                                    |                                           |
|            | hsa-miR-98-3p    |                        |                                    |                                           |
|            | hsa-miR-4666a-3p |                        |                                    |                                           |
|            | hsa-miR-190a-3p  |                        |                                    |                                           |
|            | hsa-miR-4766-5p  |                        |                                    |                                           |
|            | hsa-miR-146a-3p  |                        |                                    |                                           |
|            | hsa-miR-760      |                        |                                    |                                           |
|            | hsa-miR-4747-5p  |                        |                                    |                                           |
|            | hsa-miR-5196-5p  |                        |                                    |                                           |
|            | hsa-miR-6748-5p  |                        |                                    |                                           |
|            | hsa-miR-6748-5p  |                        |                                    |                                           |
|            | hsa-miR-6756-5p  |                        |                                    |                                           |
|            | hsa-miR-6766-5p  |                        |                                    |                                           |
|            | hsa-miR-6745     |                        |                                    |                                           |
|            | hsa-miR-363-5p   |                        |                                    |                                           |
|            | hsa-miR-4483     |                        |                                    |                                           |

| TargetScan |                  | miRDB                  | miRanda                            |                                           |
|------------|------------------|------------------------|------------------------------------|-------------------------------------------|
| Conserved  | Poorly Conserved | Gene<br>(Target score) | Good mirSVR score and<br>conserved | Non-good mirSVR<br>score<br>and conserved |
|            | hsa-miR-1293     |                        |                                    |                                           |
|            | hsa-miR-3115     |                        |                                    |                                           |
|            | hsa-miR-4511     |                        |                                    |                                           |
|            | hsa-miR-548b-3p  |                        |                                    |                                           |
|            | hsa-miR-3653-3p  |                        |                                    |                                           |
|            | hsa-miR-3658     |                        |                                    |                                           |
|            | hsa-miR-299-5p   |                        |                                    |                                           |
|            | hsa-miR-29b-1-5p |                        |                                    |                                           |
|            | hsa-miR-6765-3p  |                        |                                    |                                           |
|            | hsa-miR-3622b-3p |                        |                                    |                                           |
|            | hsa-miR-3622a-3p |                        |                                    |                                           |
|            | hsa-miR-5096     |                        |                                    |                                           |
|            | hsa-miR-130b-5p  |                        |                                    |                                           |
|            | hsa-miR-6805-3p  |                        |                                    |                                           |
|            | hsa-miR-5691     |                        |                                    |                                           |
|            | hsa-miR-7158-3p  |                        |                                    |                                           |
|            | hsa-miR-203b-3p  |                        |                                    |                                           |
|            | hsa-miR-3622a-5p |                        |                                    |                                           |
|            | hsa-miR-5582-5p  |                        |                                    |                                           |
|            | hsa-miR-4423-3p  |                        |                                    |                                           |
|            | hsa-miR-6806-5p  |                        |                                    |                                           |
|            | hsa-miR-562      |                        |                                    |                                           |
|            | hsa-miR-4789-3p  |                        |                                    |                                           |
|            | hsa-miR-642a-3p  |                        |                                    |                                           |
|            | hsa-miR-642b-3p  |                        |                                    |                                           |
|            | hsa-miR-425-5p   |                        |                                    |                                           |
|            | hsa-miR-5708     |                        |                                    |                                           |
|            | hsa-miR-4666a-5p |                        |                                    |                                           |
|            | hsa-miR-600      |                        |                                    |                                           |
|            | hsa-miR-548j-3p  |                        |                                    |                                           |
|            | hsa-miR-548ae-3p |                        |                                    |                                           |
|            | hsa-miR-548ah-3p |                        |                                    |                                           |
|            | hsa-miR-548aq-3p |                        |                                    |                                           |
|            | hsa-miR-548am-3p |                        |                                    |                                           |
|            | hsa-miR-548aj-3p |                        |                                    |                                           |
|            | hsa-miR-548x-3p  |                        |                                    |                                           |
|            | hsa-miR-548z     |                        |                                    |                                           |
|            | hsa-miR-548ac    |                        |                                    |                                           |
|            | hsa-miR-548bb-3p |                        |                                    |                                           |
|            | hsa-miR-548d-3p  |                        |                                    |                                           |
|            | hsa-miR-548h-3p  |                        |                                    |                                           |
|            | hsa-miR-302a-5p  |                        |                                    |                                           |
|            | hsa-miR-3183     |                        |                                    |                                           |

| TargetScan |                  | miRDB                  | miRanda                            |                                           |
|------------|------------------|------------------------|------------------------------------|-------------------------------------------|
| Conserved  | Poorly Conserved | Gene<br>(Target score) | Good mirSVR score and<br>conserved | Non-good mirSVR<br>score<br>and conserved |
|            | hsa-miR-4723-3p  |                        |                                    |                                           |
|            | hsa-miR-6769b-3p |                        |                                    |                                           |
|            | hsa-miR-6892-3p  |                        |                                    |                                           |
|            | hsa-miR-4687-5p  |                        |                                    |                                           |
|            | hsa-miR-5685     |                        |                                    |                                           |
|            | hsa-miR-4690-3p  |                        |                                    |                                           |
|            | hsa-miR-34a-3p   |                        |                                    |                                           |
|            | hsa-miR-3689e    |                        |                                    |                                           |
|            | hsa-miR-3689b-5p |                        |                                    |                                           |
|            | hsa-miR-3689a-5p |                        |                                    |                                           |
|            | hsa-miR-3689f    |                        |                                    |                                           |
|            | hsa-miR-4679     |                        |                                    |                                           |
|            | hsa-miR-7974     |                        |                                    |                                           |
|            | hsa-miR-4675     |                        |                                    |                                           |
|            | hsa-miR-4741     |                        |                                    |                                           |
|            | hsa-miR-4446-3p  |                        |                                    |                                           |
|            | hsa-miR-4721     |                        |                                    |                                           |
|            | hsa-miR-583      |                        |                                    |                                           |
|            | hsa-miR-4768-3p  |                        |                                    |                                           |
|            | hsa-miR-4433a-3p |                        |                                    |                                           |
|            | hsa-miR-4459     |                        |                                    |                                           |
|            | hsa-miR-506-5p   |                        |                                    |                                           |
|            | hsa-miR-548c-3p  |                        |                                    |                                           |
|            | hsa-miR-20a-3p   |                        |                                    |                                           |
|            | hsa-miR-544a     |                        |                                    |                                           |
|            | hsa-miR-6715b-3p |                        |                                    |                                           |
|            | hsa-miR-1298-5p  |                        |                                    |                                           |
|            | hsa-miR-3977     |                        |                                    |                                           |
|            | hsa-miR-623      |                        |                                    |                                           |
|            | hsa-miR-4780     |                        |                                    |                                           |
|            | hsa-miR-6780b-3p |                        |                                    |                                           |
|            | hsa-miR-5006-3p  |                        |                                    |                                           |
|            | hsa-miR-4755-5p  |                        |                                    |                                           |
|            | hsa-miR-204-5p   |                        |                                    |                                           |
|            | hsa-miR-211-5p   |                        |                                    |                                           |
|            | hsa-miR-6734-3p  |                        |                                    |                                           |
|            | hsa-miR-4297     |                        |                                    |                                           |
|            | hsa-miR-5581-5p  |                        |                                    |                                           |
|            | hsa-miR-532-5p   |                        |                                    |                                           |
|            | hsa-miR-3162-3p  |                        |                                    |                                           |
|            | hsa-miR-6748-3p  |                        |                                    |                                           |
|            | hsa-miR-5699-3p  |                        |                                    |                                           |
|            | hsa-miR-4421     |                        |                                    |                                           |

| TargetScan |                   | miRDB                  | miRanda                            |                                           |
|------------|-------------------|------------------------|------------------------------------|-------------------------------------------|
| Conserved  | Poorly Conserved  | Gene<br>(Target score) | Good mirSVR score and<br>conserved | Non-good mirSVR<br>score<br>and conserved |
|            | hsa-miR-7152-5p   |                        |                                    |                                           |
|            | hsa-miR-3074-5p   |                        |                                    |                                           |
|            | hsa-miR-3124-3p   |                        |                                    |                                           |
|            | hsa-miR-892c-3p   |                        |                                    |                                           |
|            | hsa-miR-892c-3p   |                        |                                    |                                           |
|            | hsa-miR-3667-3p   |                        |                                    |                                           |
|            | hsa-miR-6734-3p   |                        |                                    |                                           |
|            | hsa-miR-6868-3p   |                        |                                    |                                           |
|            | hsa-miR-3124-3p   |                        |                                    |                                           |
|            | hsa-miR-34b-3p    |                        |                                    |                                           |
|            | hsa-miR-27a-3p    |                        |                                    |                                           |
|            | hsa-miR-513a-5p   |                        |                                    |                                           |
|            | hsa-miR-27b-3p    |                        |                                    |                                           |
|            | hsa-miR-5096      |                        |                                    |                                           |
|            | hsa-miR-6760-3p   |                        |                                    |                                           |
|            | hsa-miR-1208      |                        |                                    |                                           |
|            | hsa-miR-181b-2-3p |                        |                                    |                                           |
|            | hsa-miR-181b-3p   |                        |                                    |                                           |
|            | hsa-miR-4420      |                        |                                    |                                           |
|            | hsa-miR-653-3p    |                        |                                    |                                           |
|            | hsa-miR-6837-3p   |                        |                                    |                                           |
|            | hsa-miR-6815-3p   |                        |                                    |                                           |
|            | hsa-miR-5580-5p   |                        |                                    |                                           |
|            | hsa-miR-6881-5p   |                        |                                    |                                           |
|            | hsa-miR-6835-5p   |                        |                                    |                                           |
|            | hsa-miR-6803-5p   |                        |                                    |                                           |
|            | hsa-miR-6751-5p   |                        |                                    |                                           |
|            | hsa-miR-6842-5p   |                        |                                    |                                           |
|            | hsa-miR-6752-5p   |                        |                                    |                                           |
|            | hsa-miR-7110-5p   |                        |                                    |                                           |
|            | hsa-miR-637       |                        |                                    |                                           |
|            | hsa-miR-6852-5p   |                        |                                    |                                           |
|            | hsa-miR-661       |                        |                                    |                                           |
|            | hsa-miR-6849-3p   |                        |                                    |                                           |
|            | hsa-miR-6512-3p   |                        |                                    |                                           |
|            | hsa-miR-6720-5p   |                        |                                    |                                           |
|            | hsa-miR-5586-5p   |                        |                                    |                                           |
|            | hsa-miR-4668-3p   |                        |                                    |                                           |
|            | hsa-miR-548c-3p   |                        |                                    |                                           |
|            | hsa-miR-8088      |                        |                                    |                                           |
|            | hsa-miR-3177-5p   |                        |                                    |                                           |
|            | hsa-miR-3664-5p   |                        |                                    |                                           |
|            | hsa-miR-4714-5p   |                        |                                    |                                           |

| TargetScan |                   | miRDB                  | miRanda                            |                                           |
|------------|-------------------|------------------------|------------------------------------|-------------------------------------------|
| Conserved  | Poorly Conserved  | Gene<br>(Target score) | Good mirSVR score and<br>conserved | Non-good mirSVR<br>score<br>and conserved |
|            | hsa-miR-514a-5p   |                        |                                    |                                           |
|            | hsa-miR-1225-5p   |                        |                                    |                                           |
|            | hsa-miR-1229-5p   |                        |                                    |                                           |
|            | hsa-miR-3614-5p   |                        |                                    |                                           |
|            | hsa-miR-6500-3p   |                        |                                    |                                           |
|            | hsa-miR-6837-3p   |                        |                                    |                                           |
|            | hsa-miR-6754-3p   |                        |                                    |                                           |
|            | hsa-miR-412-3p    |                        |                                    |                                           |
|            | hsa-miR-6515-3p   |                        |                                    |                                           |
|            | hsa-miR-1236-3p   |                        |                                    |                                           |
|            | hsa-miR-6809-3p   |                        |                                    |                                           |
|            | hsa-miR-4753-3p   |                        |                                    |                                           |
|            | hsa-miR-2117      |                        |                                    |                                           |
|            | hsa-miR-4757-3p   |                        |                                    |                                           |
|            | hsa-miR-4325      |                        |                                    |                                           |
|            | hsa-miR-7703      |                        |                                    |                                           |
|            | hsa-miR-557       |                        |                                    |                                           |
|            | hsa-miR-507       |                        |                                    |                                           |
|            | hsa-miR-29a-5p    |                        |                                    |                                           |
|            | hsa-miR-181a-2-3p |                        |                                    |                                           |
|            | hsa-miR-6509-3p   |                        |                                    |                                           |
|            | hsa-miR-1273g-3p  |                        |                                    |                                           |
|            | hsa-miR-4436b-5p  |                        |                                    |                                           |
|            | hsa-miR-3667-3p   |                        |                                    |                                           |
|            | hsa-miR-6734-3p   |                        |                                    |                                           |
|            | hsa-miR-4448      |                        |                                    |                                           |
|            | hsa-miR-6743-3p   |                        |                                    |                                           |
|            | hsa-miR-4433b-5p  |                        |                                    |                                           |
|            | hsa-miR-4433a-5p  |                        |                                    |                                           |
|            | hsa-miR-6834-3p   |                        |                                    |                                           |
|            | hsa-miR-4666b     |                        |                                    |                                           |
|            | hsa-miR-20a-3p    |                        |                                    |                                           |
|            | hsa-miR-544a      |                        |                                    |                                           |
|            | hsa-miR-8055      |                        |                                    |                                           |
|            | hsa-miR-129-5p    |                        |                                    |                                           |
|            | hsa-miR-452-3p    |                        |                                    |                                           |
|            | hsa-miR-33b-5p    |                        |                                    |                                           |
|            | hsa-miR-33a-5p    |                        |                                    |                                           |
|            | hsa-miR-3680-3p   |                        |                                    |                                           |
|            | hsa-miR-101-3p.2  |                        |                                    |                                           |
|            | hsa-let-7b-3p     |                        |                                    |                                           |
|            | hsa-let-7f-1-3p   |                        |                                    |                                           |
|            | hsa-miR-98-3p     |                        |                                    |                                           |

| TargetScan |                   | miRDB                  | miRanda                            |                                           |
|------------|-------------------|------------------------|------------------------------------|-------------------------------------------|
| Conserved  | Poorly Conserved  | Gene<br>(Target score) | Good mirSVR score and<br>conserved | Non-good mirSVR<br>score<br>and conserved |
|            | hsa-let-7a-3p     |                        |                                    |                                           |
|            | hsa-miR-1185-2-3p |                        |                                    |                                           |
|            | hsa-let-7f-2-3p   |                        |                                    |                                           |
|            | hsa-miR-1185-1-3p |                        |                                    |                                           |
|            | hsa-miR-4789-5p   |                        |                                    |                                           |
|            | hsa-miR-4729      |                        |                                    |                                           |
|            | hsa-miR-338-5p    |                        |                                    |                                           |
|            | hsa-miR-4666a-3p  |                        |                                    |                                           |
|            | hsa-miR-338-5p    |                        |                                    |                                           |
|            | hsa-miR-4666a-3p  |                        |                                    |                                           |
|            | hsa-miR-493-5p    |                        |                                    |                                           |
|            | hsa-miR-3662      |                        |                                    |                                           |
|            | hsa-miR-3163      |                        |                                    |                                           |
|            | hsa-miR-4795-3p   |                        |                                    |                                           |
|            | hsa-miR-1303      |                        |                                    |                                           |



(A)

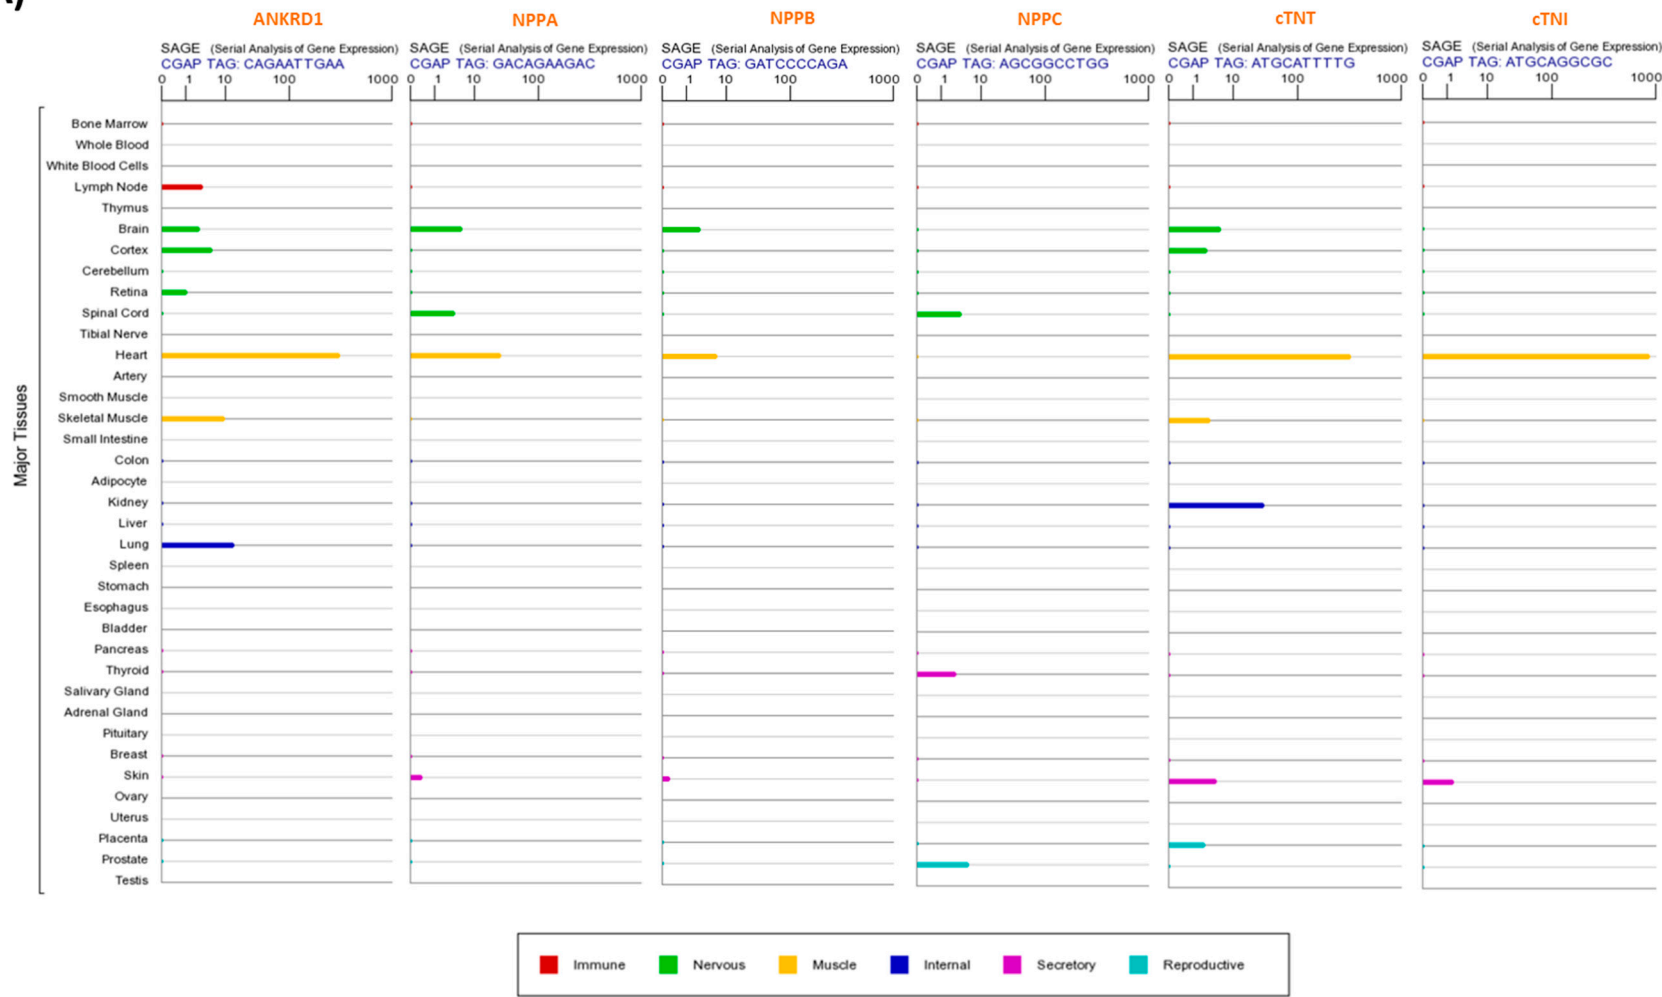

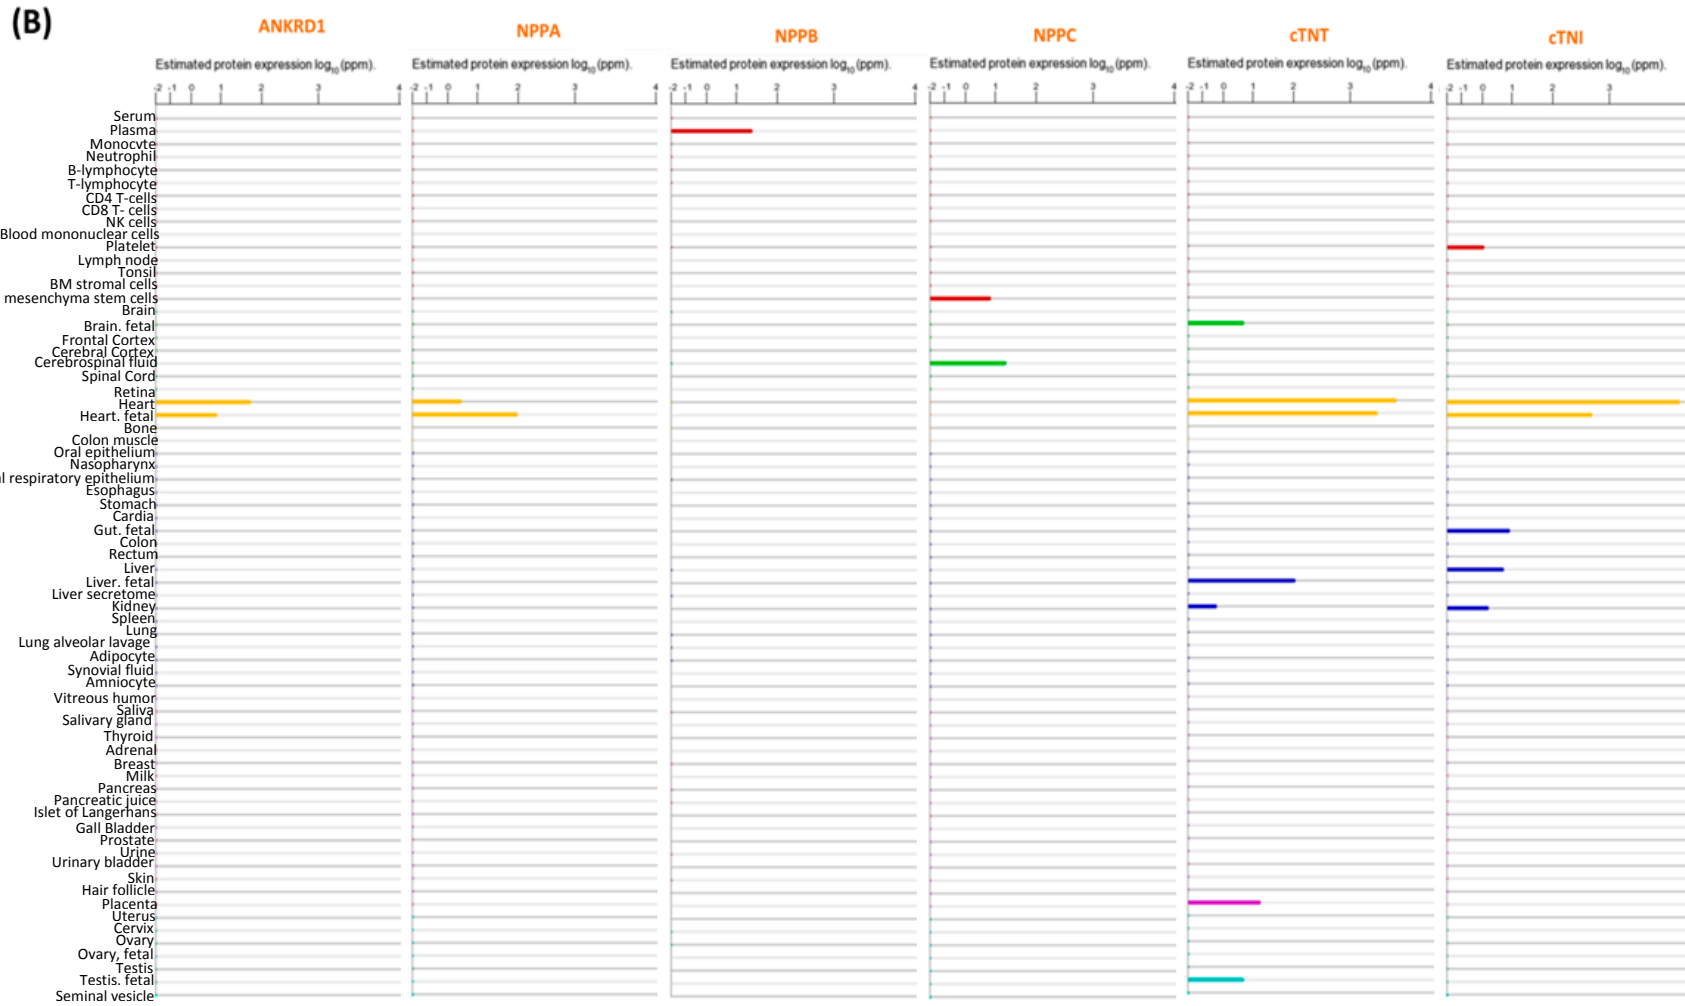

**Figure S1.** mRNA expression and protein distribution profiles of ANKRD1 in comparison with other established and upcoming cardiac biomarkers. (A) mRNA expression of various cardiac biomarkers in 19 different tissue and compartments by Serial Analysis of Gene Expression (SAGE); (B) Protein distribution profiles of various cardiac biomarkers in 92 tissues and compartments. Data and figures were extracted and adapted from the GeneCards® database ([www.genecards.org](http://www.genecards.org))

[112]. ANKRD1, ankyrin repeat domain 1; BM, bone marrow; cTNI, cardiac troponin I; cTNT, cardiac troponin T; NPPA, natriuretic peptide A; NPPB, natriuretic peptide B; NPPC, natriuretic peptide C.
